# Supplementary material
Source: PubMed Central journal article supplement (PMC2906676)
Supplement: NIHMS185109-supplement-Table_1.pdf [file NIHMS185109-supplement-Table_1.pdf]

**Supplementary Table 1:** Overview of vitamins and the immune system.

| Biological Agent                                                              | Lymphocyte Homing                                                                                                                                                                                                 | Cytokines, T <sub>H</sub> -cell differentiation                                                | T <sub>Reg</sub> -cell differentiation                                                                             | Other effects on T and B cells                                                                                                                                                     | Effects on other leukocytes                                                                                                                                                   | References                                                        |
|-------------------------------------------------------------------------------|-------------------------------------------------------------------------------------------------------------------------------------------------------------------------------------------------------------------|------------------------------------------------------------------------------------------------|--------------------------------------------------------------------------------------------------------------------|------------------------------------------------------------------------------------------------------------------------------------------------------------------------------------|-------------------------------------------------------------------------------------------------------------------------------------------------------------------------------|-------------------------------------------------------------------|
| <b>Vitamin D (1,25(OH)<sub>2</sub> VD<sub>3</sub> or synthetic analogues)</b> | ↑ CCR10 on human (but not mouse) T cells and ASCs<br>↓ FucT VII and ligands for E- and P-selectin<br>↓ α <sub>4</sub> β <sub>7</sub> -integrin, CCR9<br>↓ chemokines CCL2, CCL3, CCL5, CXCL10 in effector tissues | ↑ T <sub>H</sub> 2<br>↓ T <sub>H</sub> 1<br>↓ T <sub>H</sub> 17                                | ↑ IL-10-producing T <sub>R</sub> 1 cells (requires glucocorticoids)<br>↑ FOXP3 <sup>+</sup> T <sub>Reg</sub> cells | ↓ T- and B-cell proliferation<br>↓ CD8 <sup>+</sup> T cell cytotoxicity<br>↓ IgG production                                                                                        | ↑ cathelicidin and IL-1<br>↑ proliferation<br>↑ VDR and CYP27B1<br>↓ DC maturation (↓ expression of MHC and co-stimulatory molecules)<br>↓ IL-12 and ↑ IL-10 production by DC | 5-9, 20-26, 32-42, 99, 103, 104                                   |
| <b>Vitamin A (retinoic acid or synthetic RAR-agonists)</b>                    | ↑ Gut-homing receptors on T cells, B cells and ASC (α <sub>4</sub> β <sub>7</sub> -integrin and CCR9) and T <sub>Reg</sub> cells<br>↓ FucT VII and ligands for E- and P-selectin<br>↓ CCR4                        | ↑ T <sub>H</sub> 2<br>↓ T <sub>H</sub> 1<br>↓ T <sub>H</sub> 17 (even in the presence of IL-6) | ↑ FOXP3 <sup>+</sup> T <sub>Reg</sub> cells (requires TGFβ)                                                        | Enhances IgA secretion (also requires DCs and IL-5 or IL-6)<br>↑ iNOS/NO <i>in vivo</i><br>↑ cytotoxicity and T-cell proliferation<br>↓ B-cell proliferation<br>↓ B-cell apoptosis | ↑ DC migration to PLNs<br>↑ DC antigen-presenting capacity                                                                                                                    | 15, 16, 44, 45, 54-60, 62, 64-67, 76, 80, 83-86, 88, 97, 161, 162 |
| <b>Vitamin A (retro-retinoids)</b>                                            | -                                                                                                                                                                                                                 | -                                                                                              | -                                                                                                                  | ↑ or ↓ B- and T-cell proliferation and survival                                                                                                                                    | -                                                                                                                                                                             | 52, 53, 163                                                       |
| <b>Vitamin E (α-tocopherol)</b>                                               | ↓ monocyte adhesion (↓ CD11b, VLA-4)<br>↓ endothelial VCAM-1, ICAM-1, E-selectin, IL-8                                                                                                                            | ↓ IL-1, IL-6, TNF (monocytes/macrophages)<br>↓ IFNγ, FasL (T cells)                            | -                                                                                                                  | -                                                                                                                                                                                  | ↓ ROS (monocytes/macrophages)                                                                                                                                                 | 106-112                                                           |

ASCs, antibody-secreting cells; FucT, fucosyltransferase; ROS, reactive oxygen species; DC, dendritic cell; PLNs, peripheral lymph nodes; VLA, very late antigen; VCAM, vascular-cell adhesion molecule; ICAM, intercellular cell adhesion molecule; IL, interleukin; TNF, tumour-necrosis factor; IFN, interferon; TGF, transforming growth factor; T<sub>H</sub>, T helper; T<sub>R</sub>1 cell, IL-10-producing T regulatory type 1 cell; iNOS, inducible nitric oxide synthase; NO, nitric oxide.
